# Supplementary material for: GNN with Graph Attention Network Uncovers Hidden Subgroups in Dementia for Superior Mortality Prediction
Source: Research Square preprint supplement (doi:10.21203/rs.3.rs-7360510/v1), 2025-09-02
Supplement: Supplementary file 1 [file 5d73c222c0f669268c96953b.xlsx]

## Sheet: summary_baseline_IQR_Q4_ALL
Variabels	Condition	Cluster			P Value
		0	1	2
		1950	1226	1375
Gender(%)	Female	833(42.718)	434(35.400)	591(42.982)	<0.001
	Male	1117(57.282)	792(64.600)	784(57.018)
Length of Stay in Hospital(median[IQR])		13.034[7.897,22.473]	7.804[4.800,12.760]	11.970[6.953,21.116]	<0.001
Race(%)	Asian	36(1.846)	24(1.958)	24(1.745)	<0.001
	Black/AfricanAmerican	125(6.410)	79(6.444)	137(9.964)
	Hispanic/Latino	80(4.103)	46(3.752)	39(2.836)
	Other	68(3.487)	56(4.568)	39(2.836)
	Unknown/Unreported	374(19.179)	227(18.515)	243(17.673)
	White	1267(64.974)	794(64.763)	893(64.945)
Age(median[IQR])		66.906[54.922,76.633]	60.812[47.692,73.088]	73.661[62.960,80.376]	<0.001
INR(median[IQR])		1.200[1.100,1.400]	1.100[1.100,1.300]	1.200[1.100,1.400]	<0.001
PT(median[IQR])		13.500[12.500,15.200]	12.600[11.800,14.000]	13.600[12.500,15.900]	<0.001
PTT(median[IQR])		30.000[27.100,36.600]	29.100[27.000,32.900]	31.600[27.200,42.300]	<0.001
GCS(median[IQR])		15.000[15.000,15.000]	15.000[14.000,15.000]	15.000[14.000,15.000]	<0.001
SOFA(median[IQR])		1.000[0.000,3.000]	1.000[0.000,2.000]	1.000[0.000,3.000]	<0.001
SAPSII(median[IQR])		37.000[29.000,45.000]	29.000[22.000,36.000]	43.000[35.000,53.000]	<0.001
OASIS(median[IQR])		34.000[29.000,39.000]	29.500[24.000,34.000]	36.000[31.000,43.000]	<0.001
HeartRate(median[IQR])		105.000[91.000,122.000]	100.000[78.000,115.000]	106.000[92.000,122.000]	<0.001
MeanBP(median[IQR])		59.000[52.000,86.000]	85.000[58.000,96.500]	58.000[50.000,86.000]	<0.001
Respiratory Rate(median[IQR])		27.000[23.125,32.000]	26.000[23.000,30.000]	28.000[24.000,33.000]	<0.001
Temperature(median[IQR])		36.940[36.110,37.670]	37.000[36.280,37.500]	36.440[36.110,37.440]	<0.001
UrineOutput(median[IQR])		1,510.000[961.250,2,275.000]	1,850.000[1,181.250,2,668.250]	1,123.000[665.000,1,790.000]	<0.001
Sirs(median[IQR])		3.000[2.000,3.000]	2.000[2.000,3.000]	3.000[2.000,3.000]	<0.001
AnionGap(median[IQR])		13.000[11.000,15.000]	13.000[12.000,15.000]	13.000[11.000,16.000]	<0.001
Bicarbonate(median[IQR])		25.000[23.000,28.000]	24.000[23.000,27.000]	24.000[22.000,27.000]	0.001
Bun(median[IQR])		17.000[13.000,28.000]	14.000[11.000,20.000]	22.000[14.000,36.000]	<0.001
Calcium(median[IQR])		8.500[8.200,8.700]	8.500[8.500,9.100]	8.500[8.200,8.900]	<0.001
Chloride(median[IQR])		104.000[100.000,107.000]	104.000[100.000,106.000]	104.000[99.000,107.000]	0.447
Creatinine(median[IQR])		0.800[0.700,1.200]	0.800[0.700,1.000]	0.900[0.700,1.600]	<0.001
Glucose(median[IQR])		110.000[101.000,138.750]	104.000[98.000,127.000]	117.000[103.000,154.000]	<0.001
Sodium(median[IQR])		139.000[137.000,142.000]	139.000[137.000,142.000]	139.000[136.000,142.000]	0.481
Potassium(median[IQR])		4.000[3.700,4.300]	3.900[3.700,4.300]	4.000[3.700,4.500]	<0.001
Hematocrit(median[IQR])		29.000[26.000,31.700]	38.800[36.200,41.900]	30.400[26.400,34.950]	<0.001
Hemoglobin(median[IQR])		9.600[8.500,10.300]	13.000[12.000,14.000]	9.900[8.500,11.300]	<0.001
MCH(median[IQR])		30.500[28.900,31.300]	30.500[29.200,31.800]	30.200[28.500,31.500]	<0.001
MCHC(median[IQR])		32.700[31.700,33.400]	33.300[32.400,34.300]	32.400[31.300,33.300]	<0.001
MCV(median[IQR])		93.000[89.000,96.000]	91.000[88.000,95.000]	93.000[89.000,97.000]	<0.001
Platelet(median[IQR])		201.000[152.000,298.750]	220.000[168.000,280.750]	195.000[135.000,280.000]	<0.001
RBC(median[IQR])		3.230[2.860,3.448]	4.260[3.920,4.620]	3.320[2.845,3.800]	<0.001
RDW(median[IQR])		14.600[13.400,16.000]	13.600[13.000,14.500]	15.500[14.000,17.350]	<0.001
WBC(median[IQR])		8.900[7.200,12.200]	8.700[6.600,11.400]	9.100[6.900,12.800]	<0.001
Mortality(%)	FALSE	1847(94.718)	1120(91.354)	7(0.509)	<0.001
	TRUE	103(5.282)	106(8.646)	1368(99.491)
