# Supplementary material for: GNN with Graph Attention Network Uncovers Hidden Subgroups in Dementia for Superior Mortality Prediction
Source: Research Square preprint supplement (doi:10.21203/rs.3.rs-7360510/v1), 2025-09-02
Supplement: Supplementary file 2 [file a522a56781f76e84d4642ee4.xlsx]

## Sheet: Sheet1
	Model 1		Model 2		Model 3		Model 4
Categories	HR(95% CI)	P-Value	HR(95% CI)	P-Value	HR(95% CI)	P-Value	HR(95% CI)	P-Value
Length of Stay in Hospital
28 Days All Cause Mortality
Continues variable per unit	0.897 0.866, 0.928	<0.001	0.862 0.832, 0.893	<0.001	0.913 0.879, 0.949	<0.001	0.912 0.878, 0.948	<0.001
Quartile
Q1	——	——	——	——	——	——	——	——
Q2	0.738 0.608, 0.896	0.002	0.648 0.534, 0.787	<0.001	0.802 0.656, 0.981	0.032	0.796 0.650, 0.975	0.027
60 Days All Cause Mortality
Continues variable per unit	0.908 0.878, 0.939	<0.001	0.870 0.840, 0.901	<0.001	0.919 0.885, 0.954	<0.001	0.917 0.883, 0.953	<0.001
Quartile
Q1	——	——	——	——	——	——	——	——
Q2	0.764 0.632, 0.924	0.006	0.669 0.553, 0.808	<0.001	0.817 0.671, 0.996	0.045	0.810 0.664, 0.987	0.037
Length of Stay in ICU
28 Days All Cause Mortality
Continues variable per unit	0.944 0.913, 0.975	<0.001	0.903 0.872, 0.934	<0.001	0.933 0.898, 0.969	<0.001	0.930 0.896, 0.966	<0.001
Quartile
Q1	——	——	——	——	——	——	——	——
Q2	0.860 0.709, 1.044	0.13	0.752 0.620, 0.912	0.004	0.878 0.717, 1.075	0.2	0.869 0.708, 1.065	0.2
60 Days All Cause Mortality
Continues variable per unit	0.951 0.921, 0.982	0.002	0.910 0.879, 0.941	<0.001	0.939 0.904, 0.974	<0.001	0.936 0.902, 0.972	<0.001
Quartile
Q1	——	——	——	——	——	——	——	——
Q2	0.892 0.738, 1.079	0.2	0.780 0.645, 0.944	0.011	0.903 0.741, 1.102	0.3	0.891 0.729, 1.088	0.3
MODEL1:None MODEL2:age,gender, race MODEL3:age,gender, race,GCS score,SAPSII score,OASIS Score,SIRS score,Charlson Score MODEL4:age,gender, race,GCS score,SAPSII score,OASIS Score,SIRS score,Charlson Score,Myocardial Infarct,Congestive Heart Failure,Peripheral Vascular Disease,Cerebrovascular Disease,Chronic Pulmonary Disease,Diabetes without Chronic Comorbities,Diabetes with Chronic Comorbities,…
