# Supplementary material for: GNN with Graph Attention Network Uncovers Hidden Subgroups in Dementia for Superior Mortality Prediction
Source: Research Square preprint supplement (doi:10.21203/rs.3.rs-7360510/v1), 2025-09-02
Supplement: Supplementary file 3 [file f49a3743c7ef5a35e0ee6311.xlsx]

## Sheet: table1
Variable	Condition	Survival	Non-Survival	p
		5038	2866
Gender(%)	Female	2013(39.956)	1224(42.708)	0.017
	Male	3025(60.044)	1642(57.292)
Length of Stay in Hospital(median[IQR])		9.685[5.826,16.695]	10.864[6.236,19.053]	<0.001
Race(%)	Asian	83(1.647)	40(1.396)	<0.001
	Black/AfricanAmerican	356(7.066)	244(8.514)
	Hispanic/Latino	211(4.188)	73(2.547)
	Other	174(3.454)	67(2.338)
	Unknown/Unreported	653(12.961)	305(10.642)
	White	3561(70.683)	2137(74.564)
Age(median[IQR])		59.685(16.563)	69.054(13.400)	<0.001
INR(median[IQR])		1.200[1.100,1.300]	1.200[1.100,1.500]	<0.001
PT(median[IQR])		13.200[12.400,14.850]	13.700[12.650,15.800]	<0.001
PTT(median[IQR])		29.000[26.800,34.500]	30.600[27.100,39.900]	<0.001
GCS(median[IQR])		14.000[0.000,15.000]	13.000[0.000,15.000]	<0.001
SOFA(median[IQR])		2.000[1.000,4.000]	3.000[1.000,5.000]	<0.001
SAPSII(median[IQR])		32.000[24.000,41.000]	41.000[33.000,51.000]	<0.001
OASIS(median[IQR])		32.000[27.000,38.000]	35.000[30.000,41.000]	<0.001
HeartRate(median[IQR])		96.613[80.000,111.000]	95.987[77.842,112.000]	0.39
MeanBP(median[IQR])		78.449[59.000,90.000]	73.807[57.000,86.375]	<0.001
Respiratory Rate(median[IQR])		23.321[17.358,28.000]	23.895[17.769,29.000]	0.001
Temperature(median[IQR])		36.958[36.330,37.500]	36.778[36.280,37.339]	<0.001
UrineOutput(median[IQR])		1,770.000[1,141.250,2,610.000]	1,299.000[800.000,2,078.750]	<0.001
Sirs(median[IQR])		3.000[2.000,3.000]	3.000[2.000,3.000]	0.005
AnionGap(median[IQR])		13.000[11.500,15.000]	13.500[12.000,16.000]	<0.001
Bicarbonate(median[IQR])		24.000[22.000,27.000]	24.000[21.500,27.000]	0.012
Bun(median[IQR])		15.000[11.000,23.000]	21.000[14.000,35.000]	<0.001
Calcium(median[IQR])		8.500[8.100,8.900]	8.500[8.100,8.900]	0.261
Chloride(median[IQR])		104.000[101.000,107.000]	104.000[100.000,108.000]	0.777
Creatinine(median[IQR])		0.850[0.700,1.150]	0.950[0.700,1.500]	<0.001
Glucose(median[IQR])		116.000[103.000,143.000]	124.000[103.000,158.000]	<0.001
Sodium(median[IQR])		139.000[137.000,141.500]	139.000[136.000,142.000]	0.093
Potassium(median[IQR])		4.000[3.700,4.350]	4.025[3.700,4.500]	<0.001
Hematocrit(median[IQR])		33.000[28.800,37.700]	31.250[27.500,35.900]	<0.001
Hemoglobin(median[IQR])		10.950[9.600,12.700]	10.225[9.000,11.850]	<0.001
MCH(median[IQR])		30.600[29.200,31.800]	30.400[28.800,31.800]	<0.001
MCHC(median[IQR])		33.300[32.300,34.400]	32.900[31.800,34.000]	<0.001
MCV(median[IQR])		91.000[87.000,95.000]	92.000[88.000,96.000]	<0.001
Platelet(median[IQR])		209.500[159.125,282.000]	204.000[142.125,281.000]	<0.001
RBC(median[IQR])		3.600[3.160,4.190]	3.420[3.000,3.968]	<0.001
RDW(median[IQR])		14.100[13.200,15.300]	15.100[13.900,17.000]	<0.001
WBC(median[IQR])		9.500[7.200,12.700]	9.800[7.263,13.550]	0.004
Database(%)	MIMIC_III	2064(40.969)	1289(44.976)	0.001
	MIMIC_IV	2974(59.031)	1577(55.024)
